# Supplementary material for: Management of spontaneous coronary artery dissection: Trends over time
Source: PubMed Central journal article supplement — Vasc Med. 2023 Apr 6;28(2):131–8. doi: 10.1177/1358863X231155305 (PMC10084514; doi:10.1177/1358863x231155305), 2023-04-06

# **SUPPLEMENTAL MATERIAL**

**Supplemental Table 1.** Multivariable analysis of factors associated with revascularization after SCAD

| <b>Characteristic</b>             | <b>OR (95% CI)</b> | <b>P value</b> |
|-----------------------------------|--------------------|----------------|
| <b>Year of index SCAD event</b>   | 0.85 (0.78, 0.93)  | 0.0003         |
| <b>Age (years)</b>                | 0.96 (0.92, 1.0)   | 0.048          |
| <b>PSCAD</b>                      | 0.96 (0.52, 1.79)  | 0.905          |
| <b>SCAD location in LM or LAD</b> | 1.53 (0.64, 3.67)  | 0.340          |
| <b>Multiple SCAD territories</b>  | 7.03 (1.8, 27.4)   | 0.0049         |

**Supplemental Table 2.** Discharge medications after SCAD event by time quintiles, restricted to patients with definite SCAD

| <b>Medications</b>   | <b>Before 2013<br/>(n=27)</b> | <b>2013-2016<br/>(n=27)</b> | <b>2017<br/>(n=23)</b> | <b>2018<br/>(n=25)</b> | <b>2019<br/>(n=22)</b> |
|----------------------|-------------------------------|-----------------------------|------------------------|------------------------|------------------------|
| <b>ASA</b>           | 26 (96)                       | 26 (96)                     | 23 (100)               | 25 (100)               | 22 (100)               |
| <b>DAPT</b>          | 16 (59)                       | 17 (63)                     | 17 (74)                | 20 (80)                | 20 (91)                |
| <b>Statins</b>       | 12 (44)                       | 19 (70)                     | 18 (78)                | 20 (80)                | 19 (86)                |
| <b>Beta blockers</b> | 21 (78)                       | 25 (93)                     | 22 (96)                | 21 (84)                | 21 (96)                |
| <b>ACEi/ARBs</b>     | 10 (37)                       | 9 (33)                      | 8 (35)                 | 10 (40)                | 11 (50)                |

**Supplemental Table 3.** FMD screening modalities over time

| <b>Screening Modality</b> | <b>Before 2013<br/>(n=39)<br/>No. (%)</b> | <b>2013-2016<br/>(n=30)<br/>No. (%)</b> | <b>2017<br/>(n=28)<br/>No. (%)</b> | <b>2018<br/>(n=28)<br/>No. (%)</b> | <b>2019<br/>(n=27)<br/>No. (%)</b> | <b><i>P</i> value</b> |
|---------------------------|-------------------------------------------|-----------------------------------------|------------------------------------|------------------------------------|------------------------------------|-----------------------|
| <b>Renal Ultrasound</b>   | 1 (3)                                     | 2 (7)                                   | 3 (11)                             | 6 (21)                             | 3 (11)                             | 0.138                 |
| <b>Carotid Ultrasound</b> | 1 (3)                                     | 6 (20)                                  | 3 (11)                             | 5 (18)                             | 4 (15)                             | 0.198                 |
| <b>CTA/MRA Abdomen</b>    | 8 (20)                                    | 9 (30)                                  | 13 (46)                            | 12 (43)                            | 9 (33)                             | 0.177                 |
| <b>CTA/MRA Neck</b>       | 6 (15)                                    | 7 (23)                                  | 9 (32)                             | 9 (32)                             | 5 (18)                             | 0.392                 |
| <b>CTA/MRA Head</b>       | 6 (15)                                    | 4 (13)                                  | 6 (21)                             | 5 (18)                             | 5 (18)                             | 0.938                 |

**Supplemental Figure 1.** Management of SCAD over time, restricted to patients with definite SCAD

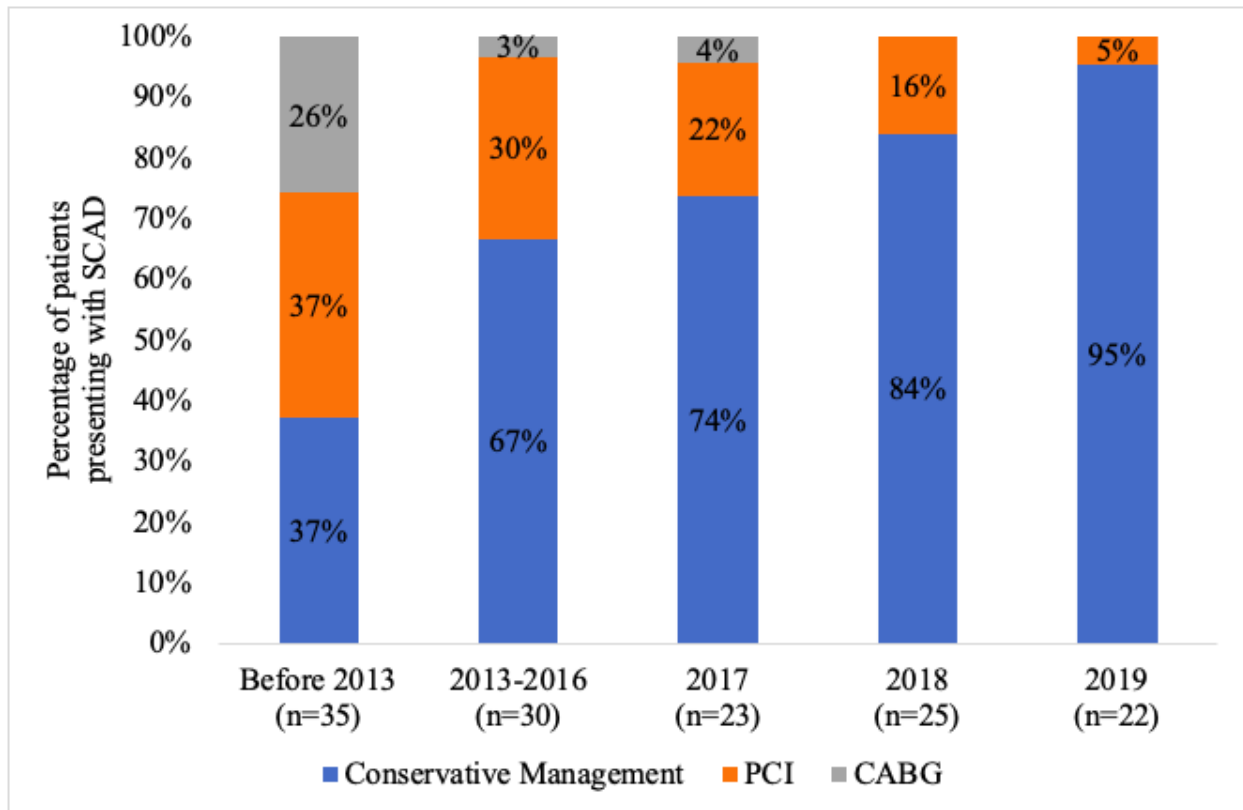

**Supplemental Figure 2.** FMD screening rates over time, restricted to patients with  $\geq 2$  cardiology follow-up visits or 1 cardiology follow-up visit at  $\geq 1$  year after their SCAD event

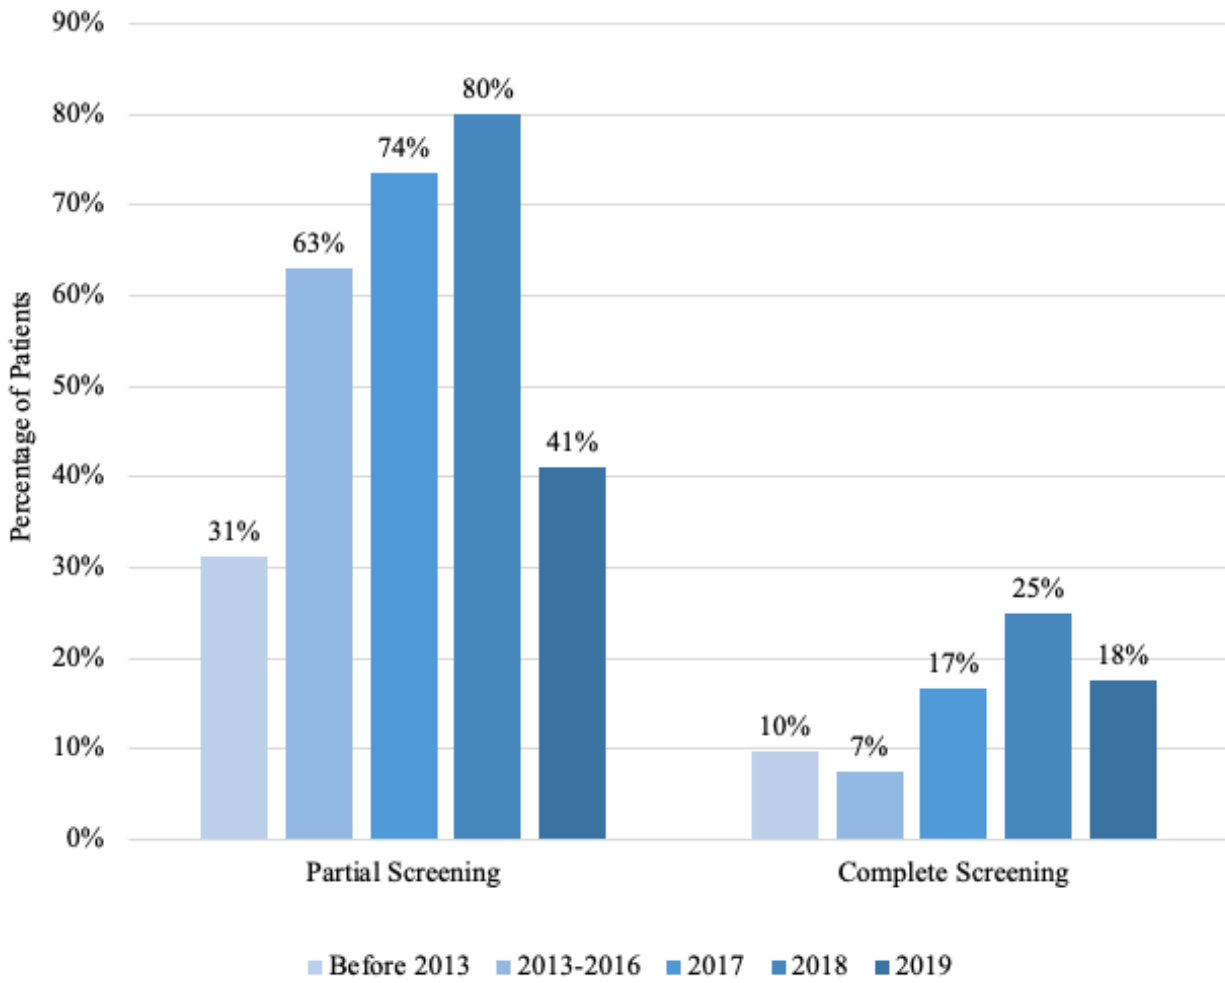

Supplement: sj-pdf-1-vmj-10.1177_1358863X231155305.pdf [file sj-pdf-1-vmj-10.1177_1358863X231155305.pdf]
